# Supplementary material for: Novel Filoviruses, Hantavirus, and Rhabdovirus in Freshwater Fish, Switzerland, 2017
Source: Emerg Infect Dis. 2021 Dec;27(12):3082–91. doi: 10.3201/eid2712.210491 (PMC8632185; doi:10.3201/eid2712.210491)
Supplement: Appendix — Additional methods and results for study of filoviruses and hantaviruses in freshwater fish, Switzerland, 2017. [file 21-0491-Techapp-s1.pdf]

# Four Filoviruses, 1 Hantavirus, and 1 Rhabdovirus in Freshwater Fish, Switzerland, 2017

## Appendix

### Methods

#### Bioinformatics

Reads were quality-trimmed using trimmomatic v. 0.36 (28), and host-derived sequences were removed by aligning reads to the European perch genome (UTU\_Pfluv\_1.1, Bioproject PRJNA450919) using STAR v. 2.6.0c (1). Non-aligned reads were assembled with SPAdes v. 3.12.0 (2). The resulting scaffolds were screened for homologies on the nucleotide and amino acid levels using BLASTn v. 2.7.1+ (3) against viral nucleotide sequences in GenBank (<https://www.ncbi.nlm.nih.gov/genbank/>) and DIAMOND v. 0.9.18 (4) and against viral protein sequences in UniProt (<https://www.uniprot.org/>), respectively. (Databases were downloaded on 20 May 2020.)

#### RT-PCR, RACE, Sanger sequencing

To fill gaps between HTS scaffolds, we reverse-transcribed extracted RNA to cDNA with SuperScript III Reverse Transcriptase (Thermo Fisher Scientific, Waltham, MA, USA) and performed PCR assays with Q5 Hot Start High-Fidelity DNA Polymerase (New England Biolabs, Ipswich, MA, USA) and scaffold-specific primers (Appendix Table 3) according to the manufacturers' instructions. We gel-purified amplicons using the NucleoSpin Gel & PCR Clean-up Kit (Macherey-Nagel, Oensingen, Switzerland) and sequenced them using a 3730 DNA Analyzer (Thermo Fisher Scientific) with the BigDye Terminator v3.1 Cycle Sequencing Kit (Thermo Fisher Scientific), using standard protocols. We performed 3' and 5' RACE, as described previously on RNA extracted from pooled organs and CNS as well as cell culture supernatants (5). We purified RACE products and sequenced them as described above. Resultant data were analyzed with Geneious v 9.1.8 (Biomatters, Auckland, New Zealand).

## In Situ hybridization (ISH)

We conducted chromogenic ISH on all of the FFPE tissues used for histopathology. Staining was performed with the RNAscope system (Advanced Cell Diagnostics, Newark, CA, USA). Using the RNAscope 2.5 HD Assay-Brown according to the manufacturer's instructions. ISH probes were designed by the company for EGLV (catalog #590061), BRPV (#590031), FIWIV (#590041), and OBLV (#590051). We counterstained slides with Mayer's hemalum solution (Merck KGaA, Darmstadt, Germany) and mounted them with Aquatex (Merck KGaA). Sections of apparently healthy European perch from a different origin, which we examined for a normal health control, served as negative controls. ISH process controls consisted of brain tissue sections of animals with bovine astrovirus CH13 (BoAstV CH13) infection and a BoAstV CH13-specific RNAscope probe [#406921] tested in parallel to each ISH experiment (6).

## References

- <jrn>1. Dobin A, Davis CA, Schlesinger F, Drenkow J, Zaleski C, Jha S, et al. STAR: ultrafast universal RNA-seq aligner. *Bioinformatics*. 2013;29:15–21. [PubMed](#)  
<https://doi.org/10.1093/bioinformatics/bts635></jrn>
- <jrn>2. Bankevich A, Nurk S, Antipov D, Gurevich AA, Dvorkin M, Kulikov AS, et al. SPAdes: a new genome assembly algorithm and its applications to single-cell sequencing. *J Comput Biol*. 2012;19:455–77. [PubMed](#) <https://doi.org/10.1089/cmb.2012.0021></jrn>
- <jrn>3. Camacho C, Coulouris G, Avagyan V, Ma N, Papadopoulos J, Bealer K, et al. BLAST+: architecture and applications. *BMC Bioinformatics*. 2009;10:421. [PubMed](#)  
<https://doi.org/10.1186/1471-2105-10-421></jrn>
- <jrn>4. Buchfink B, Xie C, Huson DH. Fast and sensitive protein alignment using DIAMOND. *Nat Methods*. 2015;12:59–60. [PubMed](#) <https://doi.org/10.1038/nmeth.3176></jrn>
- <jrn>5. Hierweger MM, Werder S, Seuberlich T. Parainfluenza virus 5 infection in neurological disease and encephalitis of cattle. *Int J Mol Sci*. 2020;21:498. [PubMed](#)  
<https://doi.org/10.3390/ijms21020498></jrn>
- <jrn>6. K  chler L, R  fli I, Koch MC, Hierweger MM, Kauer RV, Boujon CL, et al. Astrovirus-associated polioencephalomyelitis in an alpaca. *Viruses*. 2020;13:50. [PubMed](#)  
<https://doi.org/10.3390/v13010050></jrn>

**Appendix Table 1.** Results of the bioinformatics pipeline for virus discovery in samples from European perch\*

| Virus family         | Scaffold |        |               | DIAMOND best protein hit                               | Amino acid alignment |             |                |
|----------------------|----------|--------|---------------|--------------------------------------------------------|----------------------|-------------|----------------|
|                      | ID       | Length | kmer coverage |                                                        | Identity (%)         | Length [nt] | Query coverage |
| <i>Hantaviridae</i>  | 10       | 6509   | 3010          | A0A2P1GNS4 Large protein W. red spikefish virus        | 34.4                 | 2104        | 94.8           |
|                      | 59       | 3784   | 11122         | A0A2P1GNS8 Glycoprotein W. minipizza batfish virus     | 25.4                 | 836         | 63.1           |
|                      | 550      | 2160   | 15043         | A0A2P1GNX7 Nucleoprotein W. red spikefish virus        | 30.3                 | 330         | 42.4           |
| <i>Rhabdoviridae</i> | 2058     | 1454   | 5.8           | Q8UY11 Nucleocapsid protein sea trout rhabdovirus      | 42.3                 | 267         | 54.8           |
|                      | 4052     | 1146   | 3             | Q8UY99 Glycoprotein lake trout rhabdovirus             | 87.5                 | 80          | 97.2           |
|                      | 6439     | 960    | 5.7           | Q8V316 Phosphoprotein sea trout rhabdovirus            | 62.2                 | 74          | 67.5           |
|                      | 8194     | 873    | 1.9           | K7X7F6 Large protein perch rhabdovirus                 | 95.2                 | 84          | 89.4           |
|                      | 10813    | 771    | 5.2           | Q8V315 Matrix protein sea trout rhabdovirus            | 94.8                 | 213         | 82.9           |
|                      | 10889    | 768    | 1.9           | A0A0A7 Large protein eel virus European X              | 76.4                 | 254         | 98.8           |
|                      | 12097    | 731    | 2.4           | K7X7F6 Large protein perch rhabdovirus                 | 87.2                 | 243         | 99.7           |
|                      | 37625    | 394    | 1             | Q8V317 Large protein lake trout rhabdovirus            | 93.2                 | 426         | 87.9           |
|                      | 42117    | 370    | 2             | K7X7F6 Large protein perch rhabdovirus                 | 89                   | 354         | 92.7           |
|                      | 52025    | 331    | 1.4           | Q8V317 Large protein lake trout rhabdovirus            | 93.8                 | 96          | 99.7           |
|                      | 52641    | 329    | 1.1           | K7X7F6 Large protein perch rhabdovirus                 | 84.4                 | 122         | 98.9           |
|                      | 68156    | 289    | 1.3           | Q8UY99 Glycoprotein lake trout rhabdovirus 903/87      | 77.6                 | 303         | 94.7           |
|                      | 71803    | 282    | 0.96          | Q8V313 Large protein sea trout rhabdovirus             | 66.7                 | 84          | 98.8           |
|                      | 89460    | 256    | 2.4           | K7X7F67 Large sprotein perch rhabdovirus               | 98.2                 | 110         | 99.7           |
|                      | 90246    | 255    | 3.8           | K7X7F6 Large protein perch rhabdovirus                 | 82.1                 | 84          | 98.4           |
| <i>Filoviridae</i>   | 97442    | 247    | 1.7           | Q8V313 Polymerase protein sea trout rhabdovirus        | 90.8                 | 130         | 99             |
|                      | 4        | 14593  | 23.5          | A0A2P1GMM1 Large protein Huángjiāo virus               | 50.3                 | 843         | 17.6           |
|                      | 5        | 13764  | 15.2          | A0A2P1GMM1 Large protein Huángjiāo virus               | 59.8                 | 2145        | 46.5           |
|                      | 14†      | 10362  | 4.8           | A0A2P1GMM1 Large protein Huángjiāo virus               | 68                   | 1471        | 42.5           |
|                      | 1005     | 3259   | 3             | A0A2P1GMM1 Large protein Huángjiāo virus               | 47.1                 | 1089        | 99.9           |
|                      | 10054    | 3259   | 3             | A0A2P1GMM1 Large protein Huángjiāo virus               | 47.1                 | 1089        | 99.9           |
|                      | 5282†    | 1945   | 4.1           | A0A2P1GMM1 Large protein Huángjiāo virus               | 41                   | 648         | 99.6           |
|                      | 7085     | 1729   | 2.2           | A0A2P1GMM5 Nucleoprotein Huángjiāo virus               | 38.8                 | 389         | 66.8           |
|                      | 11776    | 1389   | 1.8           | A0A2P1GMM1 Large protein Huángjiāo virus               | 41.6                 | 334         | 71.7           |
|                      | 34171†   | 779    | 2.6           | A0A2P1GMM5 Nucleoprotein Huángjiāo virus               | 61.6                 | 250         | 96.3           |
|                      | 50926    | 573    | 3             | A0A2P1GMM1 Large protein Huángjiāo virus               | 58.4                 | 190         | 99.5           |
| Other                | 1        | 10069  | 95            | A0A1I9QNF6 Capsid protein marbled eel polyomavirus     | 27.1                 | 491         | 13.8           |
|                      | 201      | 2764   | 6.8           | A0A1S7J028 LargeT Rousettus aegyptiacus polyomavirus 1 | 28.6                 | 255         | 26.6           |
|                      | 44589    | 359    | 0.7           | A0A2P1GNG4 Polyprotein Běihǎi rabbitfish calicivirus   | 57.4                 | 115         | 95.3           |

\*Abbreviations: W., Wēnlíng; put, putative.

†These scaffolds were linked by RT-PCR resulting in the sequence of a novel virus here named Kander virus (KNDV).

**Appendix Table 2.** Comparison of conserved terminal sequences in genome segments of selected genera of the order *Bunyavirales*\*

| Genus                                                      | 3' terminus         | 5' terminus           |
|------------------------------------------------------------|---------------------|-----------------------|
| <i>Orthohantavirus</i>                                     | AUCAUCAUCUG...      | ...AUGAUGAU           |
| <i>Orthobunyavirus</i>                                     | <b>UCAUCAUGA...</b> | <b>...UCGUGUGAUGA</b> |
| <i>Orthonairovirus</i>                                     | AGAGUUUCU...        | ...AGAAACUCU          |
| <i>Orthospovirus</i>                                       | UCUCGUUAG...        | ...CUAACGAGA          |
| <i>Phlebovirus</i>                                         | UGUCGUUAG...        | ...CUAACGAGA          |
| <i>Actinivirus</i>                                         | <b>UCAUCAUU...</b>  | <b>...AAUGAUGA</b>    |
| (Species: <i>Perch actinivirus</i> , <i>Bunyavirales</i> ) |                     |                       |

\*Adapted from Barr JN, Weber F, Schmaljohn CS. Bunyavirales: the viruses and their replication. In: Howley PM, Knipe DM, Whelan SPJ, editors. Fields virology. 7th ed. Philadelphia, Pennsylvania, USA: Wolters Kluwer/Lippincott Williams & Wilkins; 2020. p. 706-49.

**Appendix Table 3.** Gene-specific primers for RT-PCRs, Sanger sequencing, and RACE

| Name                    | Sequence               | Comment               |
|-------------------------|------------------------|-----------------------|
| RT_FiloV_3140F          | TGTGAGCTCACCAACCGTAC   | Confirmation          |
| RT_FiloV_3483R          | GAGCCGTTTCTCCCAAGACA   | Confirmation          |
| RT_HantaV_2950F         | CCCGGAAGTCCAGAACCCTC   | confirmation          |
| RT_HantaV_3269R         | CGGTGAGGGAATCATCGGAG   | confirmation          |
| RT_RhabdoV_1064F        | AAATGCCATTGCCAACACCG   | confirmation          |
| RT_RhabdoV_1370R        | GTACGCTCCGACAGTGTCTT   | confirmation          |
| RT_HantaV_L_493R        | AACTGAAGCTCGATGCCCCA   | RACE                  |
| RT_HantaV_L_322R        | CCAGCTGCCCCAGGGAATATC  | RACE                  |
| RT_HantaV_L_5998F       | CGTCAGGTCTCGGATCAAGG   | RACE                  |
| RT_HantaV_L_6190F       | CTCCGCTGTGAACATGGTTG   | RACE                  |
| RT_HantaV_M_541R        | TTCTGCCGCCTTTCAAAGC    | RACE                  |
| RT_HantaV_M_305R        | CTCTTGGATCTGGGTGTCTG   | RACE                  |
| RT_HantaV_M_3273F       | ACATAGGCACTGTCTCAAGC   | RACE                  |
| RT_HantaV_M_3466F       | TTCCGACGAGACCTCCTTCT   | RACE                  |
| RT_HantaV_S_526R        | CAGCCTGTGTTCCGGAGTA    | RACE                  |
| RT_HantaV_S_281R        | GCTGGATCTGAAGGCAGGAG   | RACE                  |
| RT_HantaV_S_1656F       | CCCAAACAGGTGCGTCATCA   | RACE                  |
| RT_HantaV_S_1848F       | CAAGGTGGTCTCCATGGGG    | RACE                  |
| RT_RhabdoV_1335F        | ATCCAACATGCCCCGAAAGA   | connection of contigs |
| RT_RhabdoV_1684R        | TCCCAGCTCCACTAATCCCT   | connection of contigs |
| RT_RhabdoV_2391F        | GAATGGAATGGATGCCAGCG   | connection of contigs |
| RT_RhabdoV_2863R        | GCCACGACCATCGCATTTTT   | connection of contigs |
| RT_RhabdoV_3358F        | GCAATGAGAAAGTGCTGAACCA | connection of contigs |
| RT_RhabdoV_3750R        | CCCATGCCGCAAGTTTGATAC  | connection of contigs |
| RT_RhabdoV_3765F        | GTAGAGGGGAAGTTGTGCGT   | connection of contigs |
| RT_RhabdoV_4214R        | CTGCTGTGCAACGATTGCAC   | connection of contigs |
| RT_RhabdoV_5913F        | GTTGGGCGTATGCAGACTCT   | connection of contigs |
| RT_RhabdoV_6225R        | GCTCTGCGTTGACAAAGTCA   | connection of contigs |
| RT_RhabdoV_6256F        | GATCTTTTCGGCATTGGGGC   | connection of contigs |
| RT_RhabdoV_6559R        | TCCAAGATTTTGGTCAGAGGCA | connection of contigs |
| RT_RhabdoV_6636F        | CATGTAGAACGACGGCCCTT   | connection of contigs |
| RT_RhabdoV_7823R        | TCCTCGAATTGCCGATTGT    | connection of contigs |
| RT_RhabdoV_7793F        | AGTAGAGTTTCACAATCCGGCA | connection of contigs |
| RT_RhabdoV_8342R        | CAGCGATATCAGGGATTTCGGT | connection of contigs |
| RT_RhabdoV_8780F        | GCTGAGAGCCGCTATCACAT   | connection of contigs |
| RT_RhabdoV_9479R        | GGACAACGCAGATGCCTTGA   | connection of contigs |
| RT_RhabdoV_10828F       | GAGGCTCGACAGGGATCAAG   | connection of contigs |
| RT_RhabdoV_11124R       | TCTTCTCCCTTTTGCAACTGA  | connection of contigs |
| RT_Rhabdo_6952F         | AGGAGTCAAGGGCAAGGAGA   | connection of contigs |
| RT_Rhabdo_7555R         | GCTGACTGGATTGTCTCGTCA  | connection of contigs |
| RT_Rhabdo_6980F         | ACGAGCACATCAGTATTGCCA  | connection of contigs |
| RT_Rhabdo_575R          | CTCGTTTGGATGCCCCACGA   | RACE                  |
| RT_Rhabdo_330R          | CCAATTCGCTCGGCAATCTG   | RACE                  |
| RT_Rhabdo_11050F        | CGAATCTCTGCTTGCAAGTGC  | RACE                  |
| RT_Rhabdo_11222F        | AGGAAGATGGCCACCATTGG   | RACE                  |
| P_FiloV_13to3360_1435F  | CACAGTGGAAGGGCCATGA    | connection of contigs |
| P_FiloV_13to3360_1884R  | CCGGTGCAACGGCTGTTAT    | connection of contigs |
| P_FiloV_13to5716_12038F | GTCTGCATAGGGAAGGTGGC   | connection of contigs |
| P_FiloV_13to5716_12590R | CTTGTCGCTCCTGAAGACGT   | connection of contigs |
| Perch_FiloV2_296R       | TTGCAAGAATGAAGGCACACC  | RACE                  |
| Perch_FiloV2_511R       | AAACCTTGCGGCTTGATTGG   | RACE                  |
| Perch_FiloV2_14328F     | ACGCCTTGGTCAAATCCACA   | RACE                  |
| Perch_FiloV2_14118F     | TTGCTCTGTGGCAGCAGAA    | RACE                  |

| Name                | Sequence              | Comment |
|---------------------|-----------------------|---------|
| Perch_FiloV1_260R   | GTCGACTGAGTTGTCTCCCC  | RACE    |
| Perch_FiloV1_455R   | GTATGGTAATGCCGTTGGTGC | RACE    |
| Perch_FiloV1_13492F | TCCTAGGGAGTCTGCAGAGG  | RACE    |
| Perch_FiloV1_13275F | GACAGGTCCGGAGTGAAGTC  | RACE    |

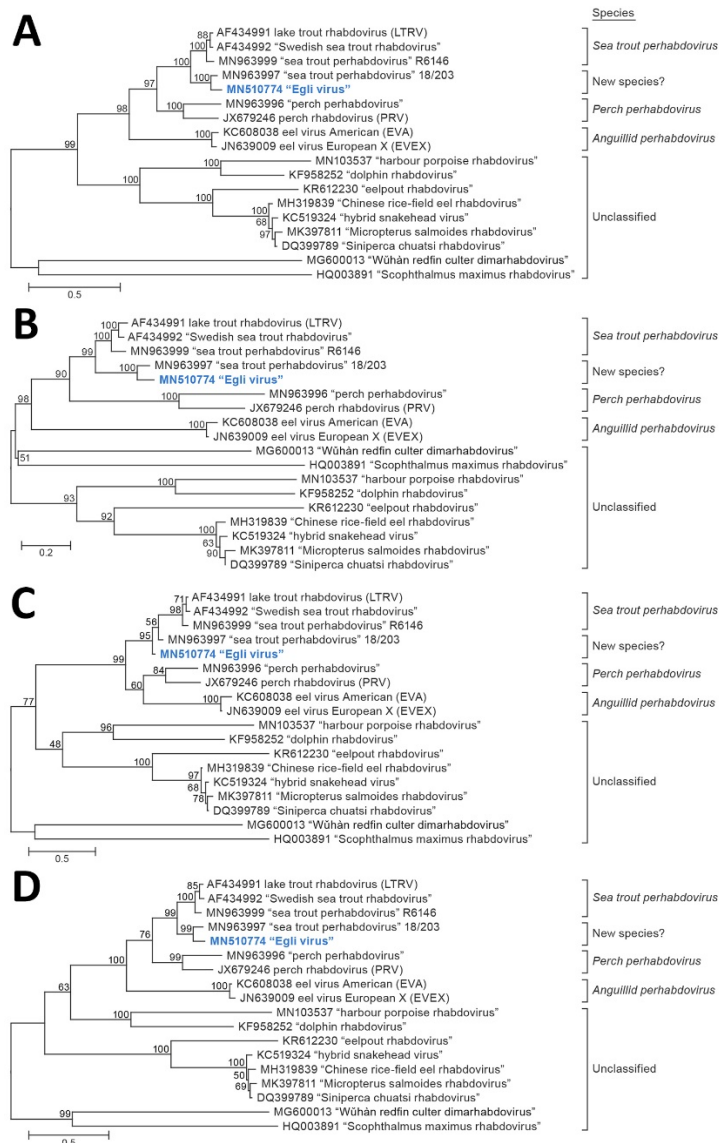

**Appendix Figure 1.** Maximum-likelihood phylogenetic trees of the nucleotide sequences of Egli virus (EGLV; bold blue) genes with those of viruses belonging to representative members of the genus *Perhabdovirus*. a) nucleoprotein gene (N), b) phosphoprotein gene (P) c) matrix protein gene (M), and d) glycoprotein gene (G). Numbers near nodes on the trees indicate bootstrap values. Branches are labeled by GenBank accession number, virus name, and virus name abbreviation in parenthesis. The names of unclassified, likely perhabdoviruses are placed in quotation marks and printed without name abbreviations. The scale (bottom left) indicates the number of substitutions per site, reflected by the branch lengths.

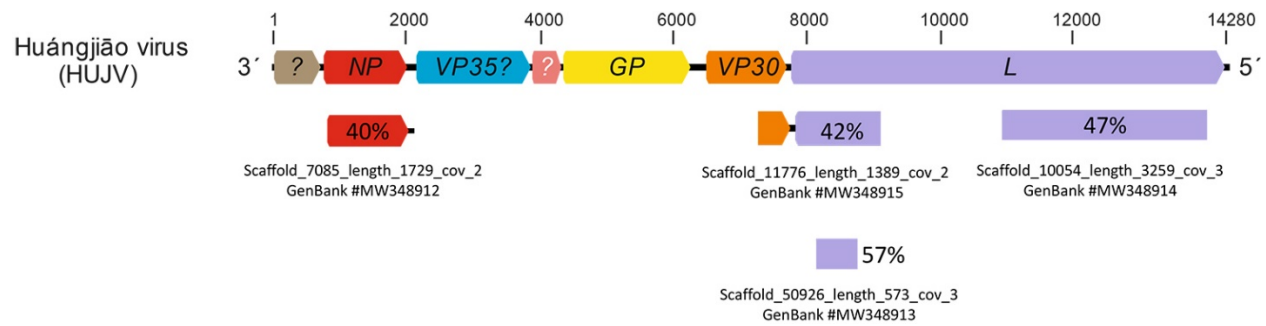

**Appendix Figure 2.** Mapping of additional scaffolds identified in European perch with hits to Huángjiāo virus (HUJV). The HUJV genome organization is shown schematically on the top and allocated scaffolds (scaffold IDs [shortened] and GenBank accession numbers) to the genomic regions of the encoded proteins with respective hits and their identity at the amino-acid sequence level. Open reading frames (ORFs) are indicated as colored arrows. ORFs encoding HUJV-like proteins (indicated as percentages) are depicted by the same color. *NP*, nucleoprotein gene; *VP35*, polymerase cofactor gene; *GP*, glycoprotein gene; *VP30*, transcriptional activator gene; *L*, large protein gene. Question marks indicate novel ORFs.

**A**

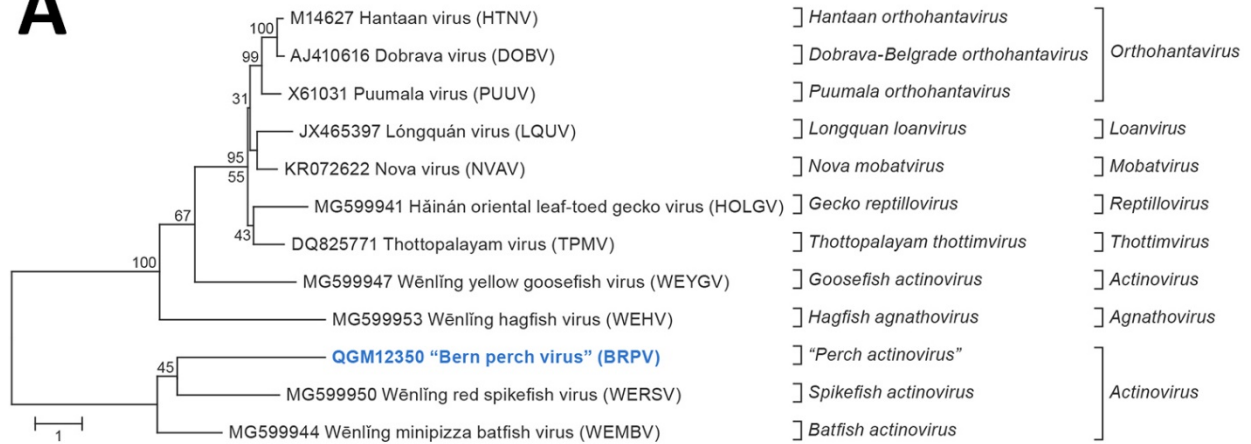

**B**

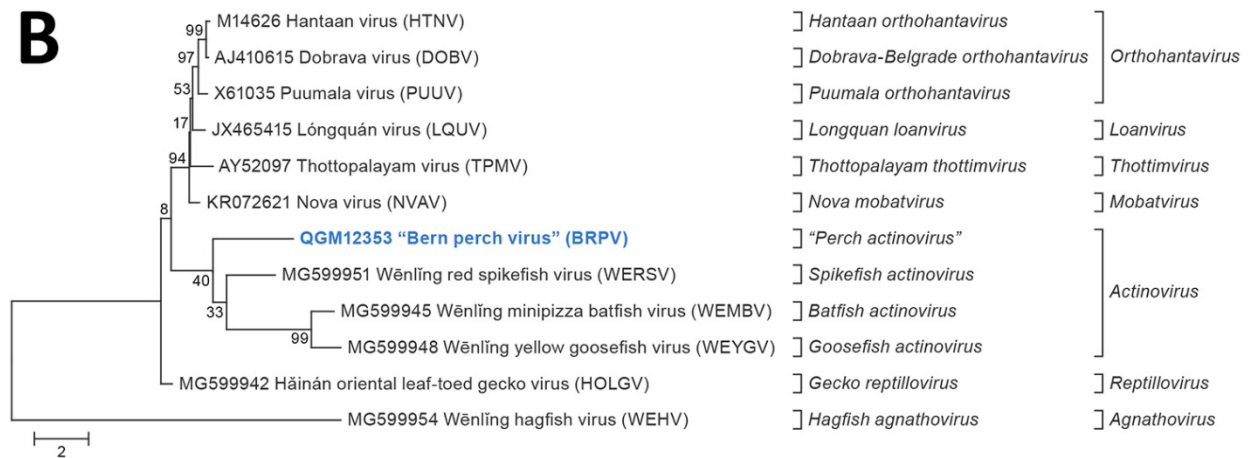

**Appendix Figure 3.** Maximum-likelihood phylogenetic trees of amino-acid sequences of Bern perch virus (BRPV; bold blue) structural proteins with those of viruses belonging to representative members of the family *Hantaviridae*. a) Glycoprotein precursor (GPC), encoded by the M segment, b) nucleocapsid protein, encoded by the S segment. Numbers near nodes on the trees indicate bootstrap values. Branches are labeled by GenBank accession number, virus name, and virus name abbreviation in parenthesis. Unclassified, likely hantaviruses and officially proposed hantavirus species names are placed in quotation marks. The scale (bottom left) indicates the number of substitutions per site, reflected by the branch lengths.

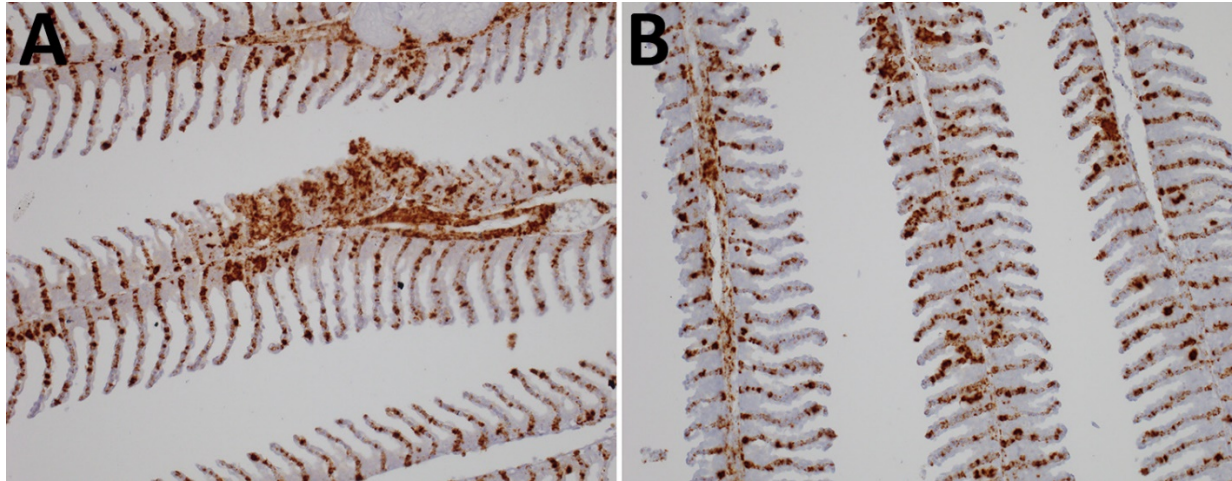

**Appendix Figure 4.** Detection of Bern perch virus (BRPV) genomic RNA in gills of two individual European perch (A, B) by in situ hybridization (brown labeling).
